# Supplementary material for: Exploring the capabilities of electrical resistivity tomography to study subsea permafrost
Source: Copernicus journal article supplement (doi:10.5194/tc-2022-60), 2022-04-20
Supplement: Supplementary file [file tc-2022-60-AC1-supplement.pdf]

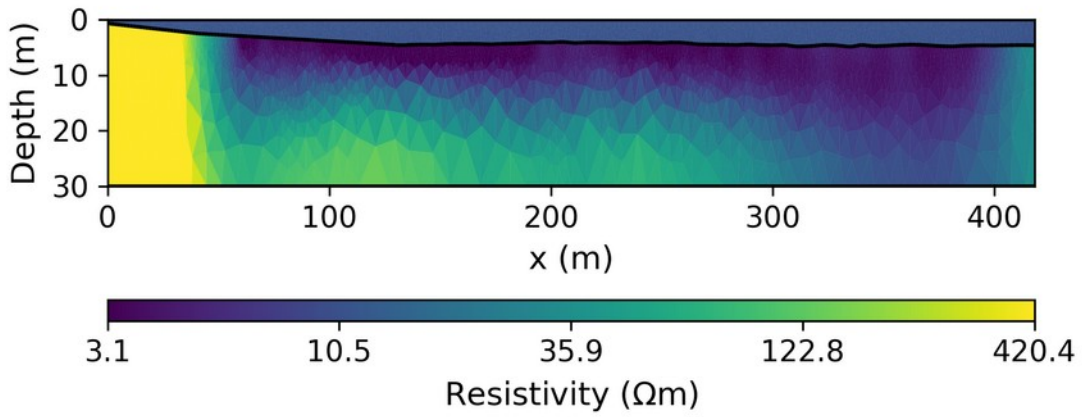

Figure 1. Smooth inversion result for our Bykovsky data set constraining the water layer.

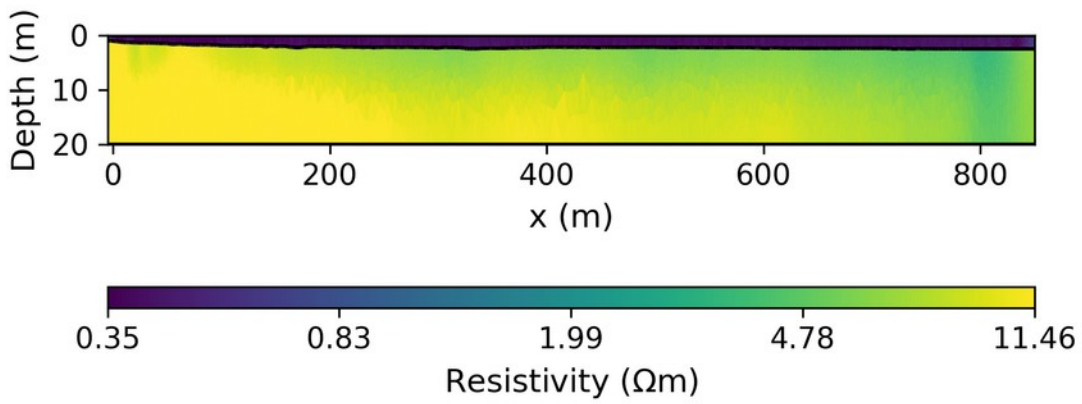

Figure 2. Smooth inversion result for our Drew Poin data set constraining the water layer.
