# Supplementary material for: Exploring the capabilities of electrical resistivity tomography to study subsea permafrost
Source: Copernicus journal article supplement (doi:10.5194/tc-2022-60), 2022-04-20
Supplement: Supplementary file [file tc-2022-60-AC2-supplement.pdf]

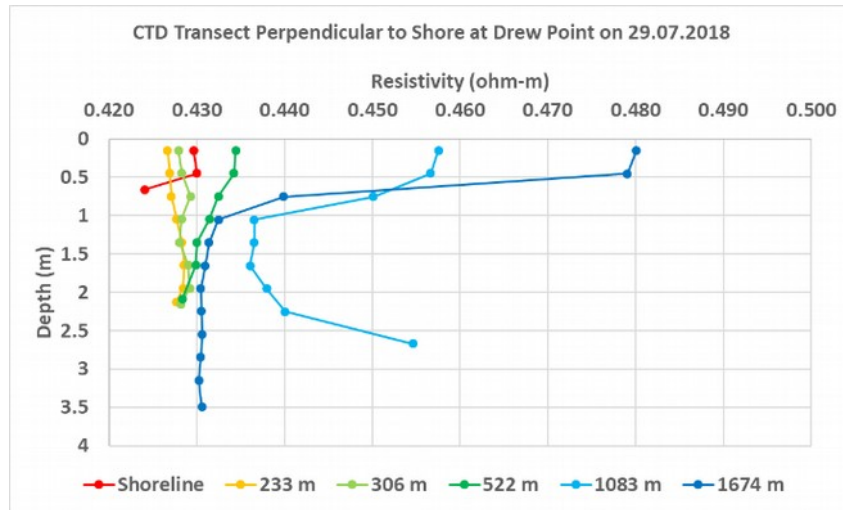

Figure 1. CTD profiles taken along our ERT transect at our Drew Point field site. Note that the line colors indicate the distance from the shoreline.
